# Supplementary figures and images for: Structure-based nuclear import mechanism of histones H3 and H4 mediated by Kap123
Source: eLife journal article supplement (doi:10.7554/elife.30244), 2017-10-16

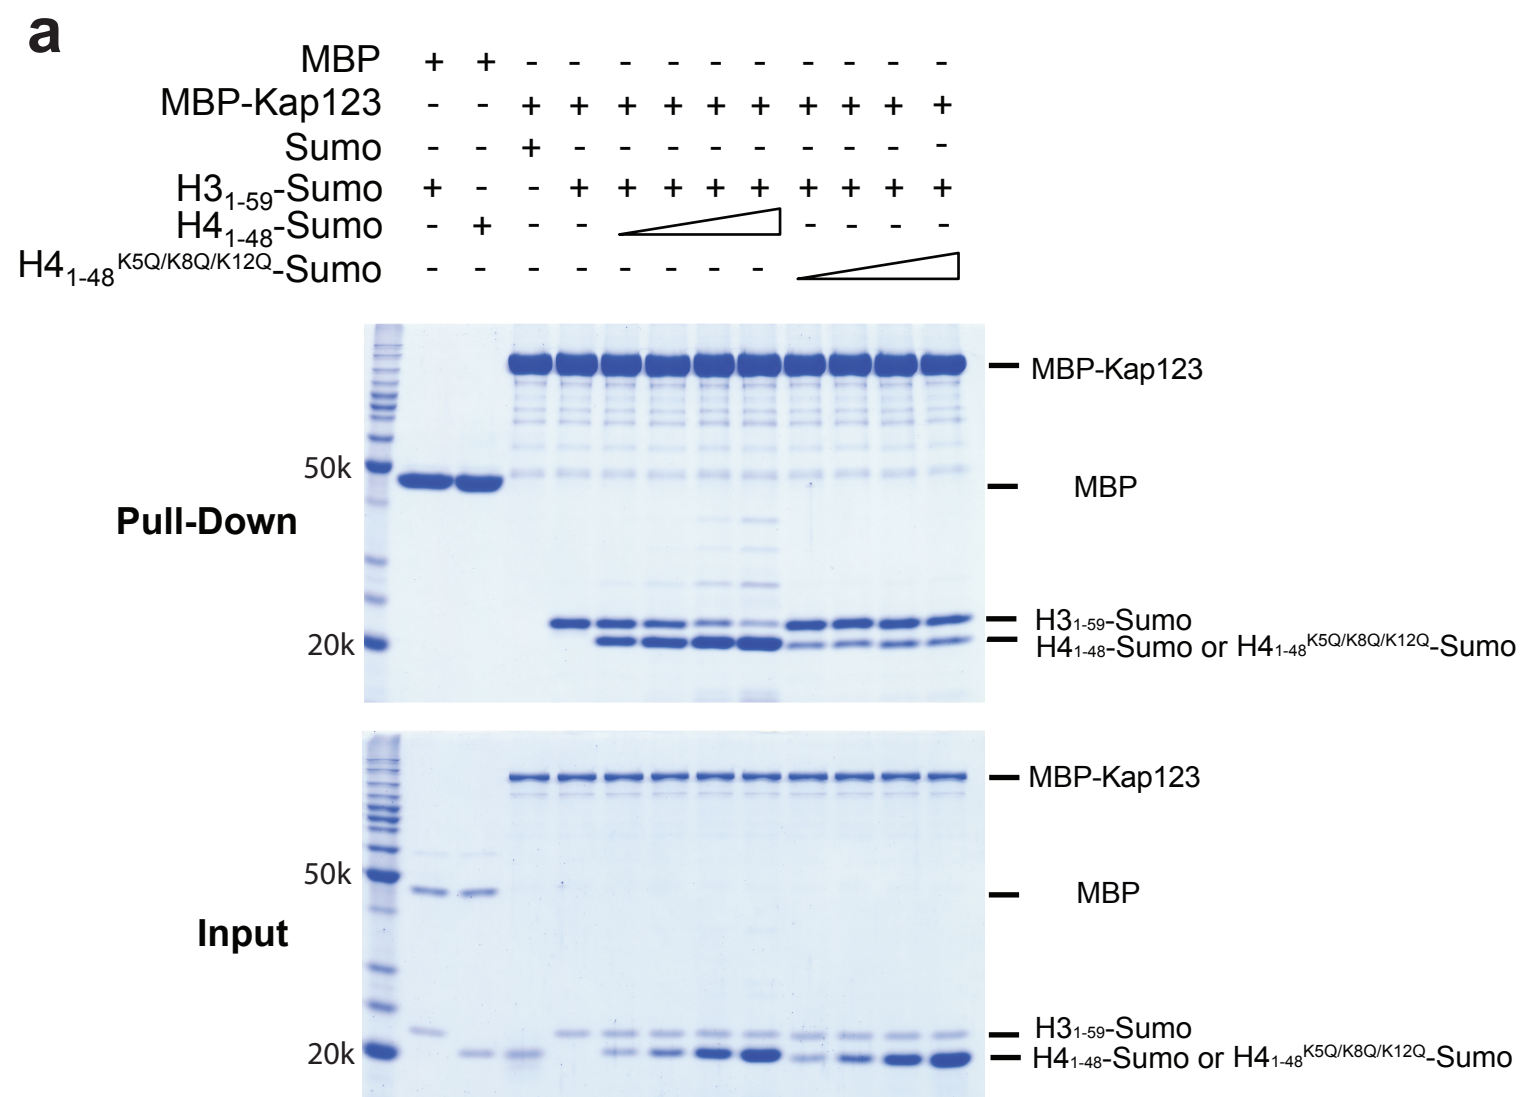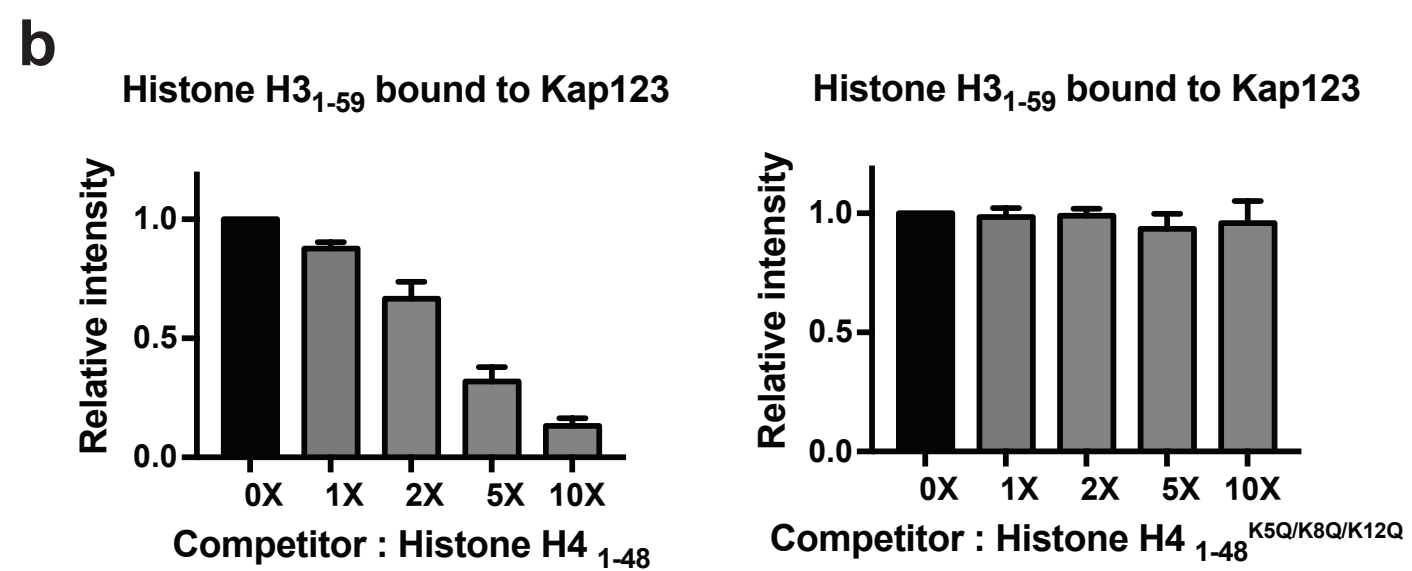

Supplement: supp [file elife-30244-supp-v1.zip]

**a**

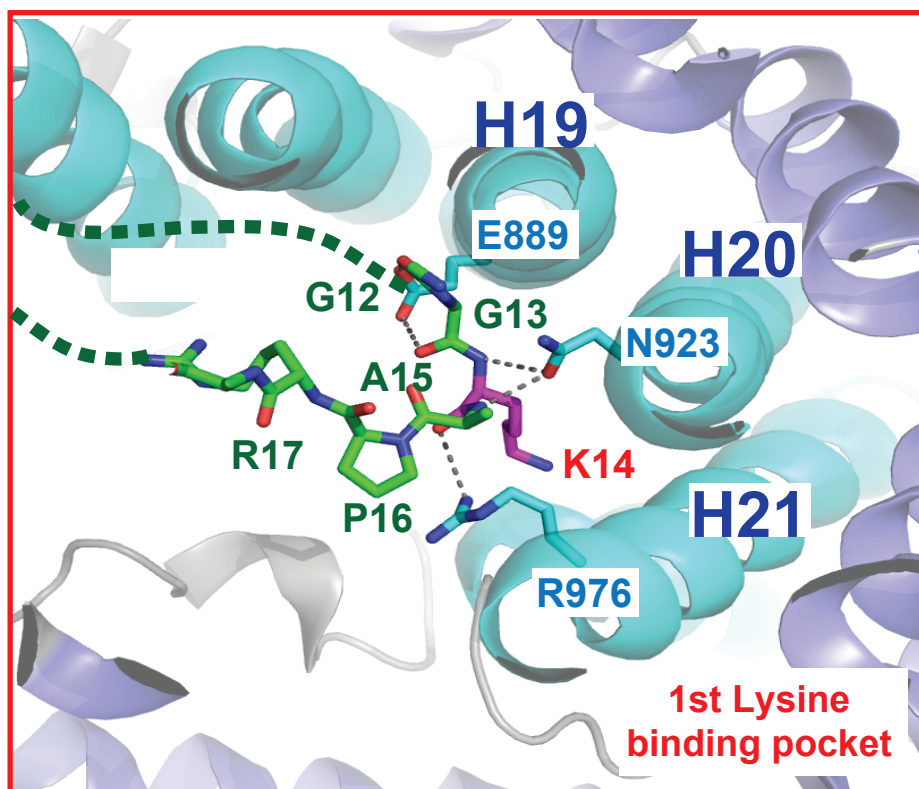

**b**

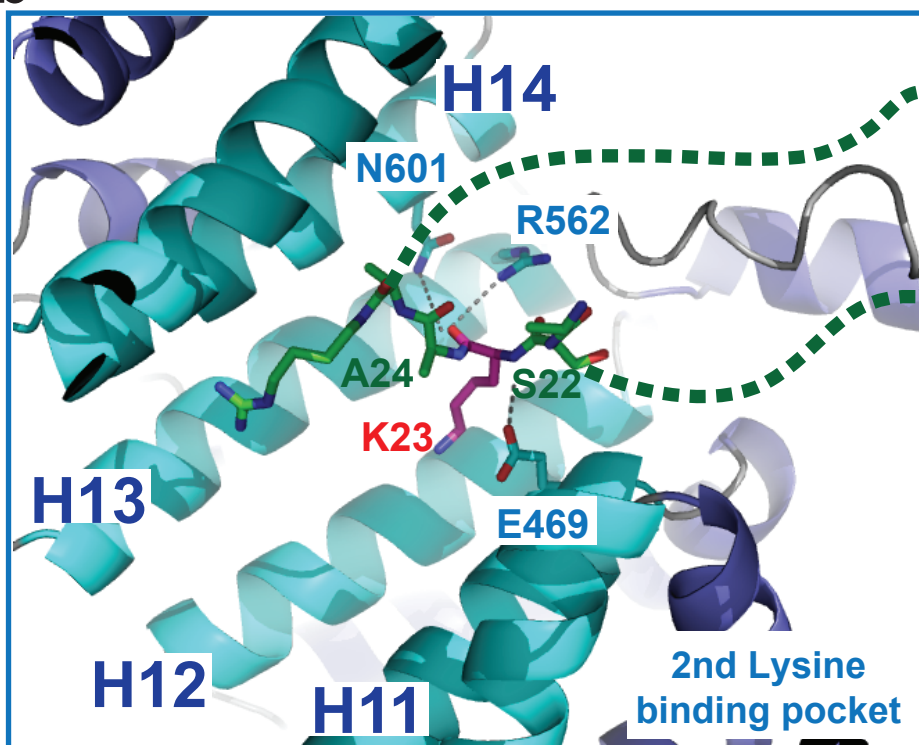

Supplement: supp [file elife-30244-supp-v1.zip]

## Kap121

(*S. cerevisiae*)

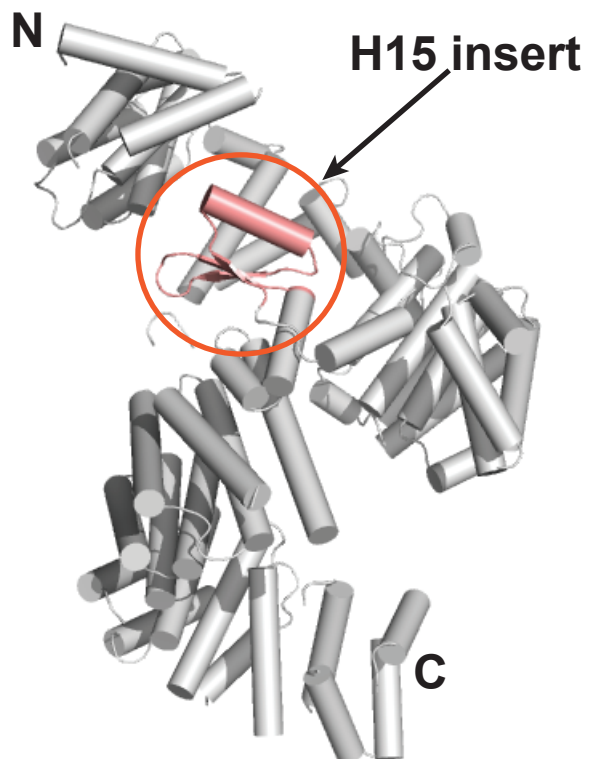

## Kap123

(*K. lactis*)

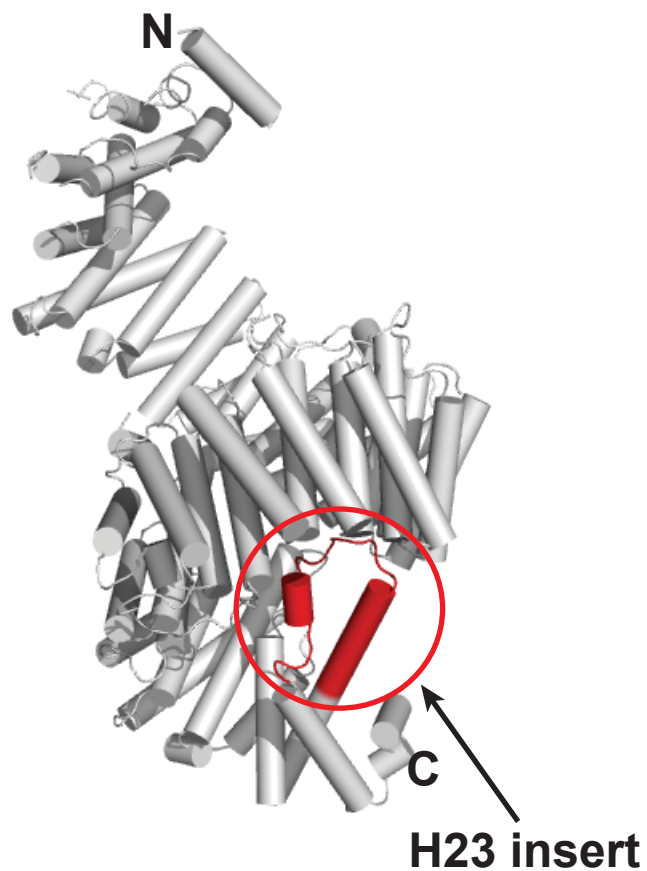

R.M.S.difference: 9.98 Å

Supplement: supp [file elife-30244-supp-v1.zip]

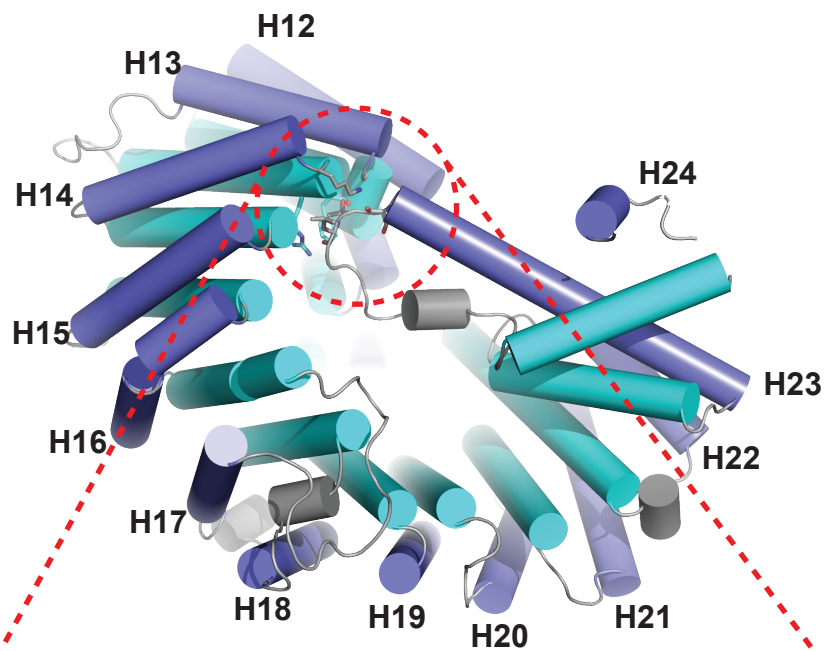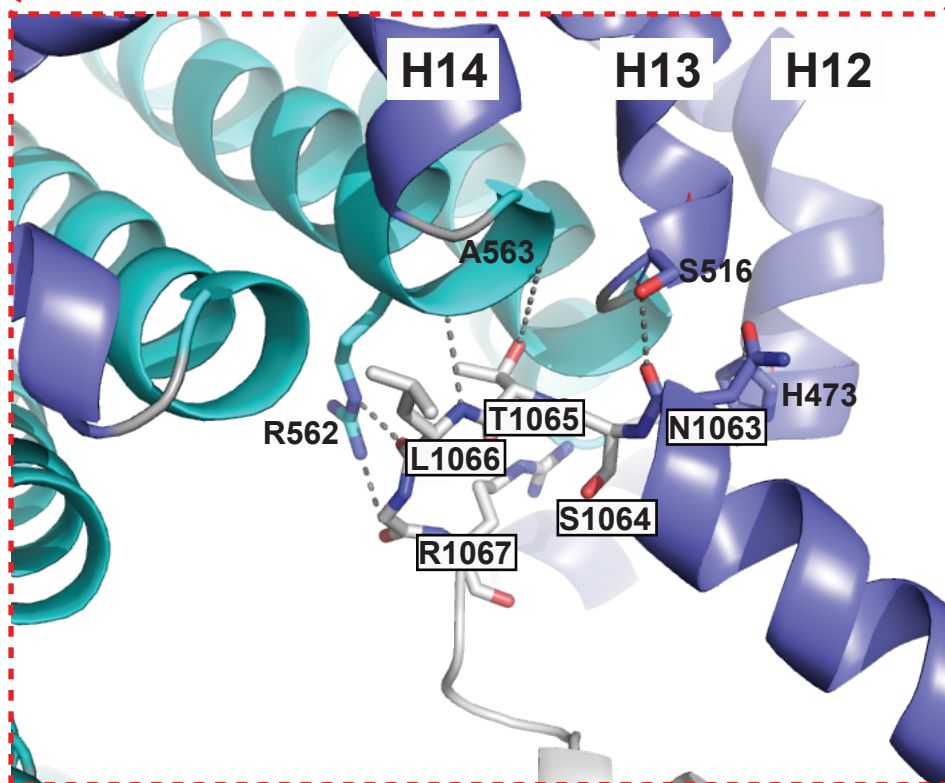

Supplement: supp [file elife-30244-supp-v1.zip]

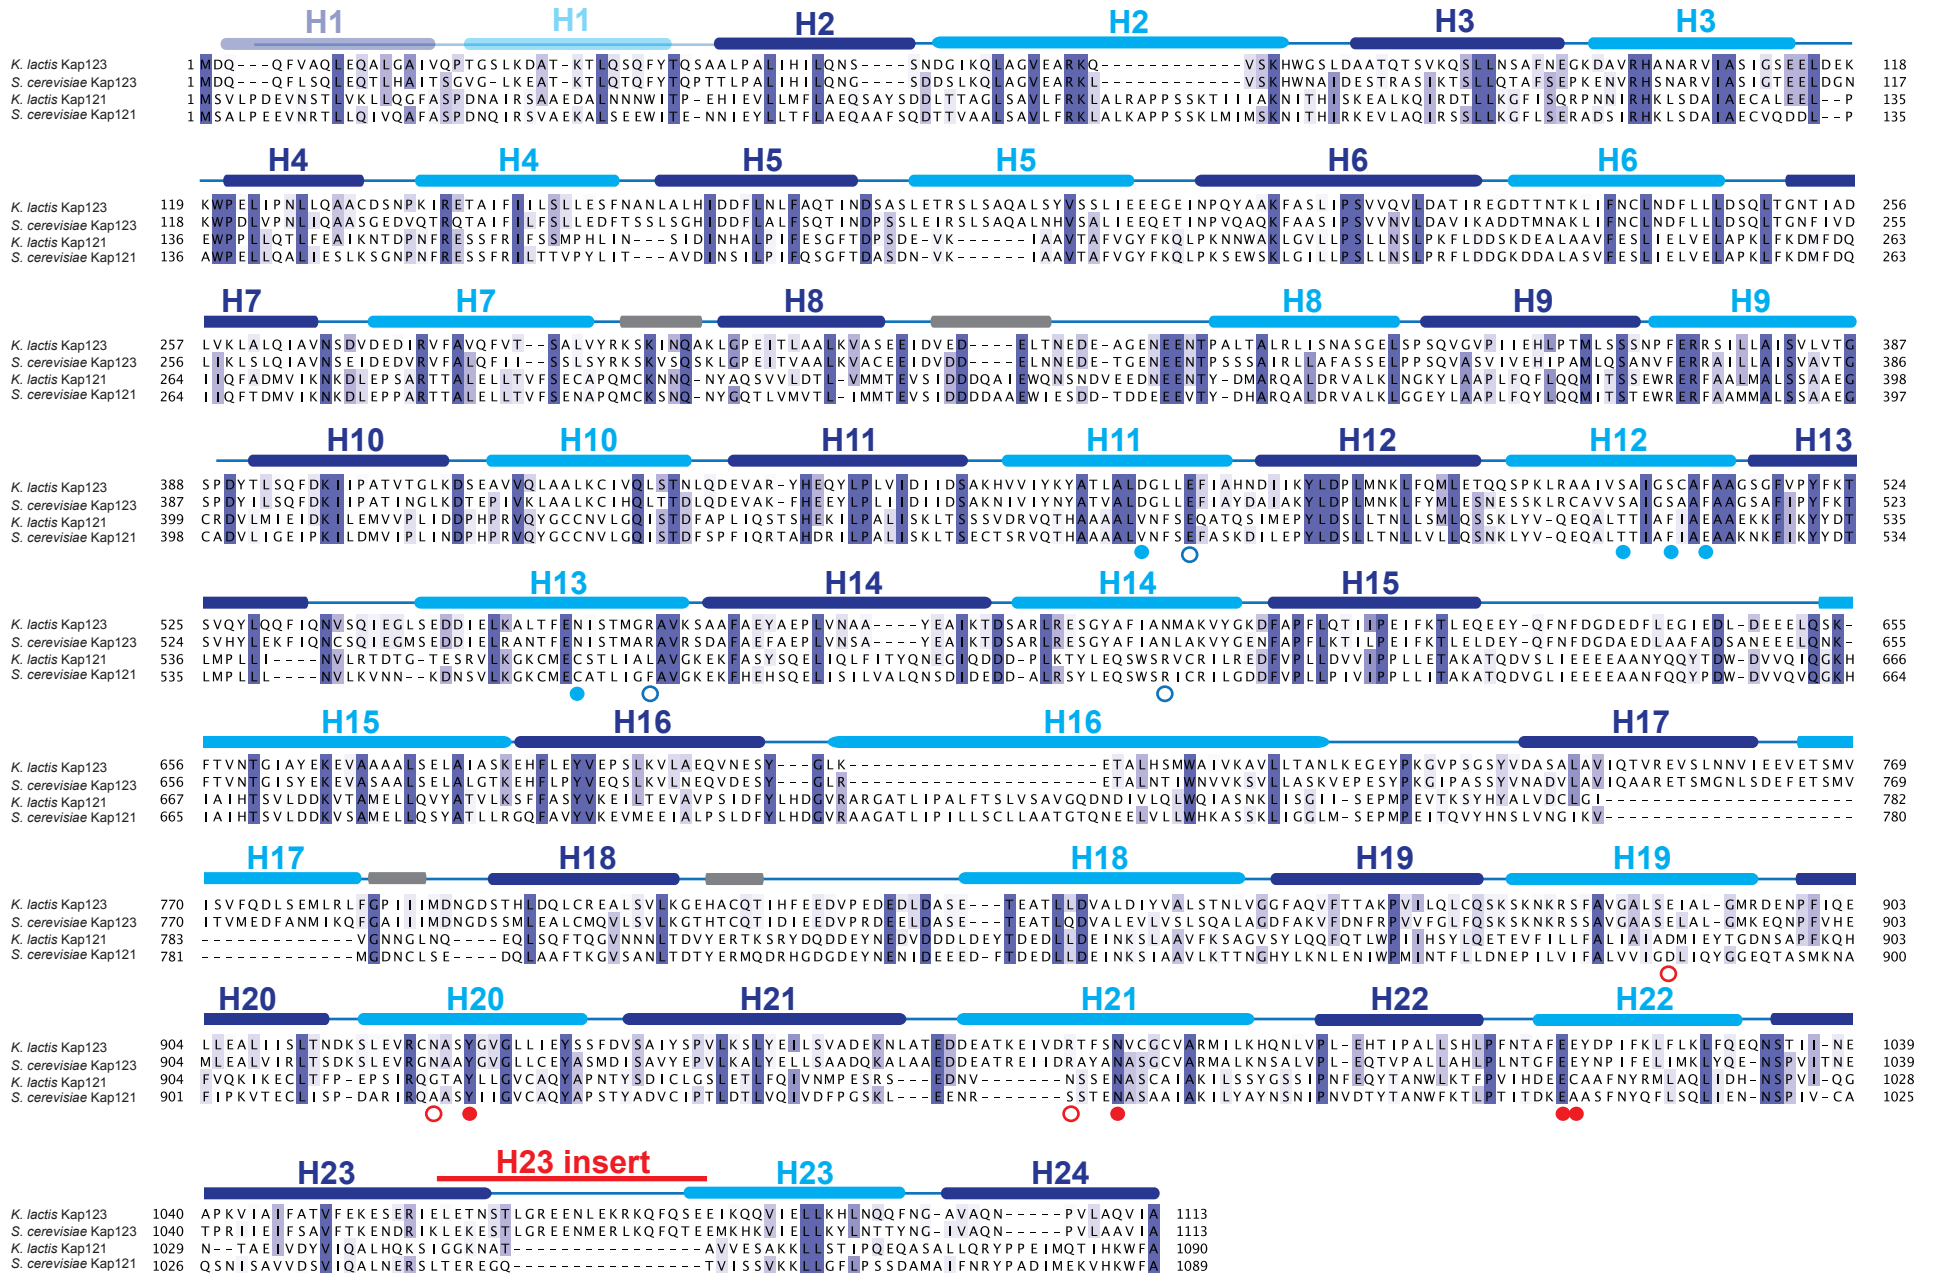

Supplement: supp [file elife-30244-supp-v1.zip]

**a**Karyopherin- $\beta 2$  + H3<sub>1-47</sub>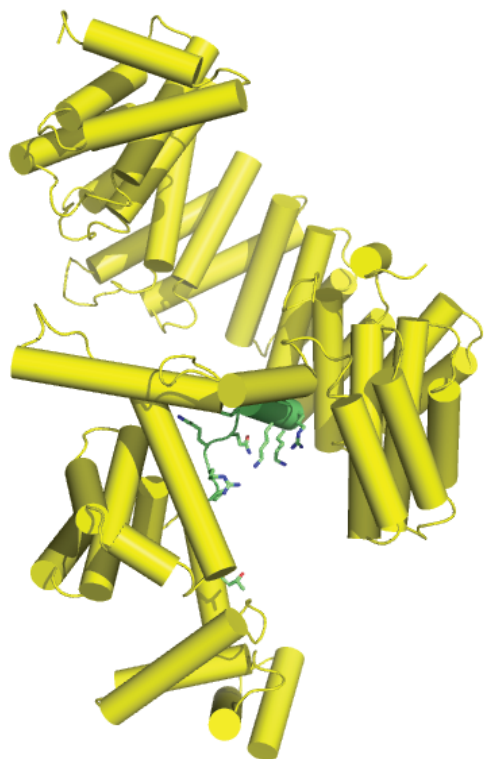Kap123 + H3<sub>1-28</sub>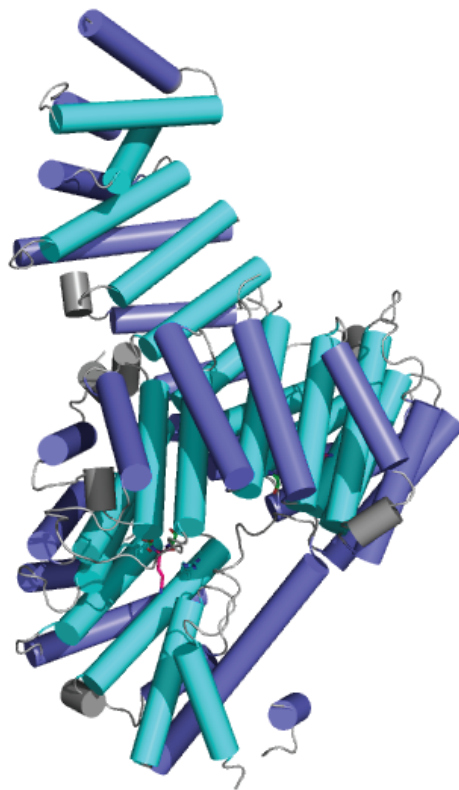**b**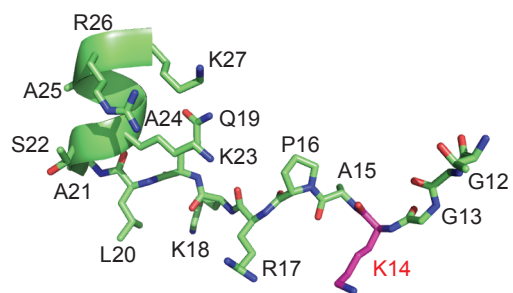H3<sub>12-27</sub> (Karyopherin- $\beta 2$ )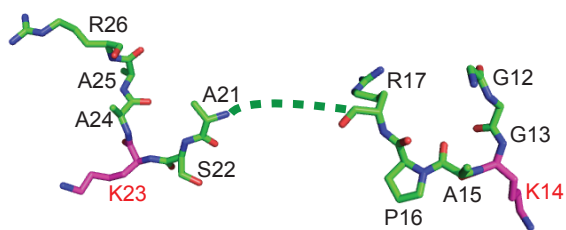H3<sub>12-17, 21-26</sub> (Kap123)

Supplement: supp [file elife-30244-supp-v1.zip]

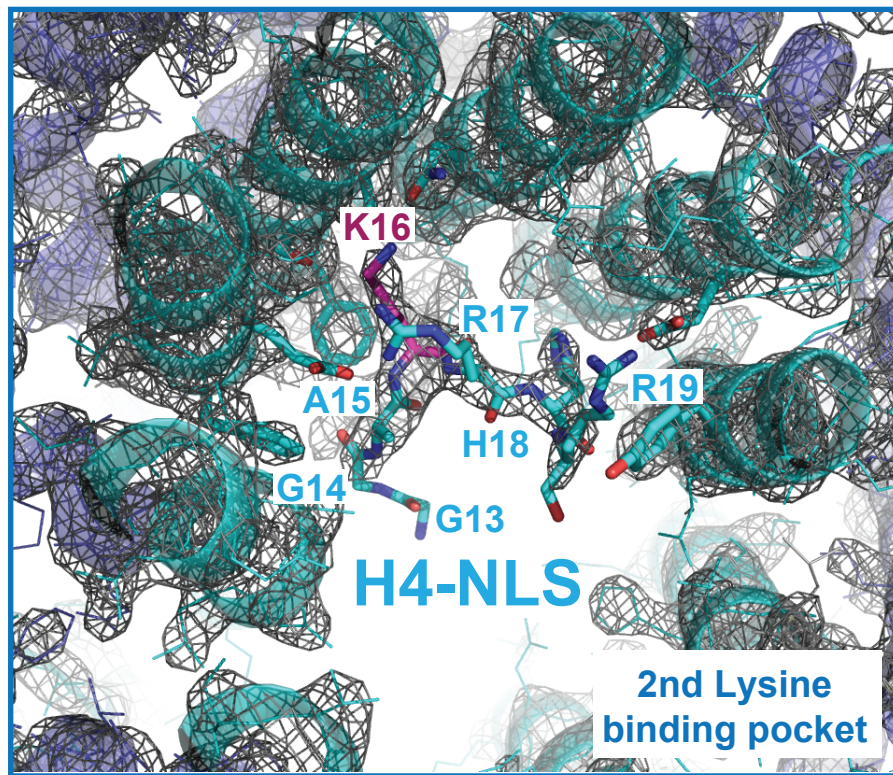

Supplement: supp [file elife-30244-supp-v1.zip]

**a**

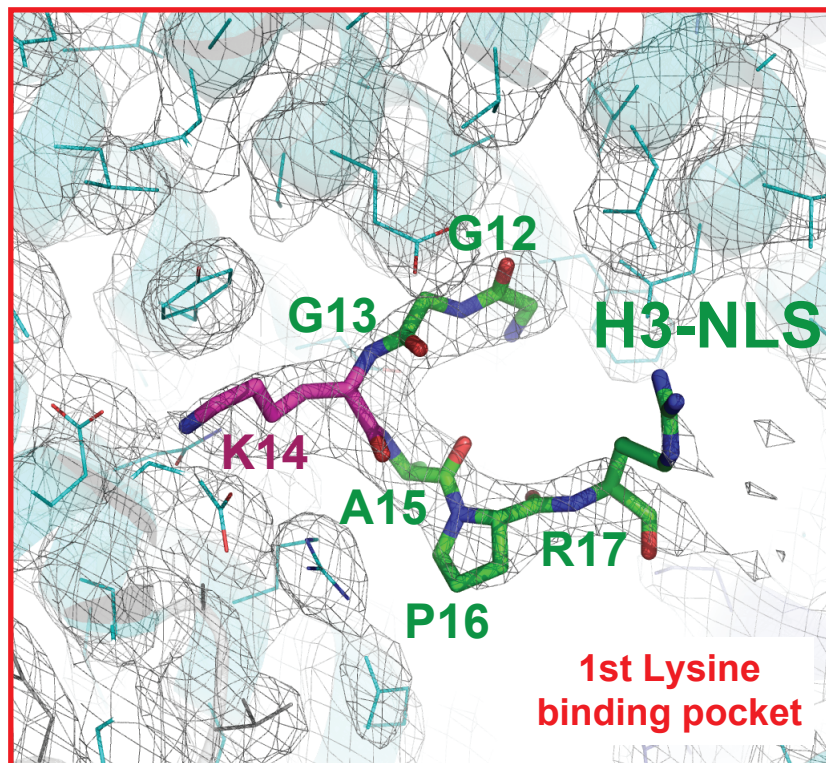

**b**

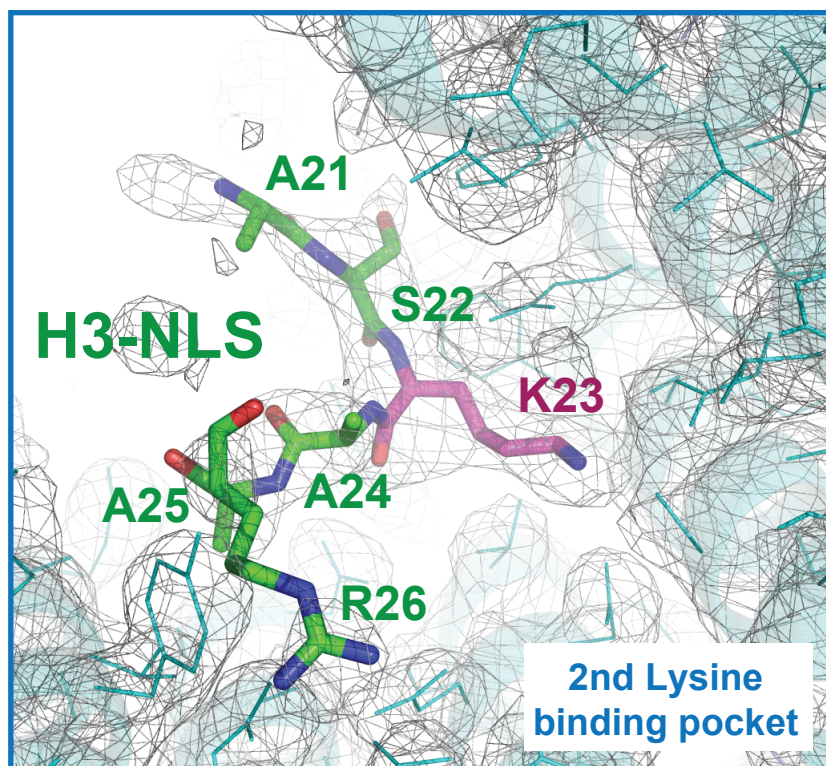

Supplement: supp [file elife-30244-supp-v1.zip]
